# Supplementary material for: Selenium-Rich Yeast Peptide Fraction Ameliorates Imiquimod-Induced Psoriasis-like Dermatitis in Mice by Inhibiting Inflammation via MAPK and NF-κB Signaling Pathways
Source: MDPI journal article supplement (doi:10.3390/ijms23042112), 2022-02-14
Supplement: s1 [file s1]

## **Supplemental material**

### **Selenium-rich yeast peptide fraction ameliorates imiquimod-induced psoriasis-like dermatitis in mice by inhibiting MAPK and NF- $\kappa$ B signaling pathways**

Hengke Guo<sup>1</sup>, Min Li<sup>1</sup>, Hongmei Liu<sup>1,2, \*</sup>

<sup>1</sup> Hubei Key Laboratory of Bioinorganic Chemistry and Materia Medica, School of Chemistry and Chemical Engineering, Huazhong University of Science and Technology, Wuhan 430074, People's Republic of China

<sup>2</sup> Hubei Engineering Research Center for Biomaterials and Medical Protective Materials, Wuhan, 430074, China

\* Corresponding author. Prof. Hongmei Liu, School of Chemistry and Chemical Engineering, Huazhong University of Science and Technology, Wuhan 430074, China

E-mail: hongmeiliuhust@hust.edu.cn; Tel: +86 27 87543032; Fax: +86 27 87543632

**Table S1 Sequences and relative area of some peptides in SeP**

| Peptide sequence | Length | MW (Da) | Relative area |
|------------------|--------|---------|---------------|
| VLPVPF           | 6      | 670.41  | 3369900000    |
| LLPF             | 4      | 488.30  | 3312100000    |
| FFPM             | 4      | 540.24  | 2484800000    |
| LTPTFV           | 6      | 676.38  | 2381100000    |
| ALDDPFLA         | 8      | 860.43  | 2157600000    |
| DLLPV            | 5      | 555.33  | 2125900000    |
| VELLL            | 5      | 585.37  | 2029400000    |
| LLPW             | 4      | 527.31  | 1767400000    |
| LLDLL            | 5      | 585.37  | 1735400000    |
| GVPGDFNLA        | 9      | 888.43  | 1654600000    |
| LGVMLVG          | 7      | 687.40  | 1639100000    |
| DSLVMP           | 6      | 660.32  | 1593400000    |
| PDDFVLS          | 7      | 791.37  | 1548600000    |
| LGDLPF           | 6      | 660.35  | 1541200000    |
| VTPFVPL          | 7      | 771.45  | 1488800000    |
| LDADGLL          | 7      | 716.38  | 1460000000    |
| LDLL             | 4      | 472.29  | 1430000000    |
| VFLPV            | 5      | 573.35  | 1390000000    |
| VGPGDFDLA        | 9      | 889.42  | 1240000000    |
| VIDSTGVFT        | 9      | 938.48  | 1230000000    |
| ALDDPFLA         | 8      | 860.43  | 1210000000    |
| LALPL            | 5      | 525.35  | 1190000000    |

Note: Relative area refers to the relative integrated area of the peptide content obtained by LC-MS/MS detection, indicating the relative abundance of the peptide in SeP.

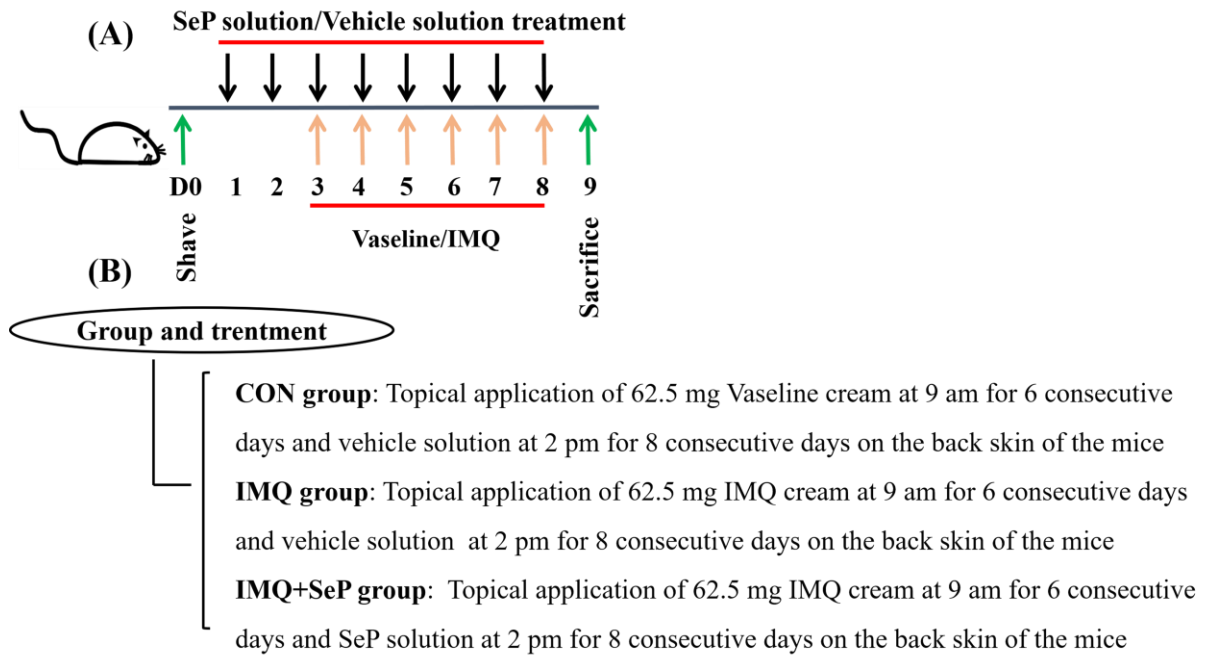

**Scheme S1. The schematic design of animal experiments**

**Table S2 Primers sequences used for the detection of related gene expression**

|       | Gene           | Sense Primer (5' to 3')            | Anti-sense Primer (5' to 3')         |
|-------|----------------|------------------------------------|--------------------------------------|
| Mouse | TNF- $\alpha$  | ACC CTC ACA CTC AGA TCA<br>TCT T   | GGT TGT CTT TGA GAT CCA<br>TGC       |
|       | IL-17A         | TTT AAC TCC CTT GGC GCA<br>AAA     | CTT TCC CTC CGC ATT GAC AC           |
|       | IL-17F         | TGC TAC TGT TGA TGT TGG<br>GAC     | AAT GCC CTG GTT TTG GTT<br>GAA       |
|       | IFN- $\gamma$  | GTT ACT GCC ACG GCA CAG<br>TCA TTG | ACC ATC CTT TTG CCA GTT<br>CCT CCA G |
|       | VEGF           | GCA CAT AGG AGA GAT GAG<br>CTT CC  | CTC CGC TCT GAA CAA GGC T            |
|       | IL-23          | TCC TCC AGC CAG AGG ATC<br>ACC C   | AGA GTT GCT GCT CCG TGG<br>GC        |
|       | CXCL-1         | TAG GGT GAG GAC ATG TGT<br>GG      | AAA TGT CCA AGG GAA GCG T            |
|       | P65            | GTT TCG GGT AGG CAC AGC<br>AAT     | TCG AGT CTC CAT GCA GCT<br>ACG       |
|       | IL-1 $\beta$   | CAC TAC AGG CTC CGA GAT<br>GAA     | TGT CGT TGC TTG GTT CTC CT           |
|       | GAPDH          | GGG CTC TCT GCT CCT CCC<br>TGT     | CGG CCA AAT CCG TTC ACA<br>CCG       |
| Human | TNF- $\alpha$  | ATG TTG TAG CAA ACC CTC<br>AAG C   | CCT TGA AGA GGA CCT GGG<br>AGT A     |
|       | IL-17A         | GCC TTC AAG ACT GAA CAC<br>CG      | TGA CAT GCC ATT CCT CAG GG           |
|       | IL-23          | CTC CCT GAT AGC CCT GTG            | GAC TGA GGC TTG GAA TCT              |
|       | IL-6           | CTG AGG GCT CTT CGG CAA<br>AT      | GCC CAG TGG ACA GGT TTC<br>TG        |
|       | $\beta$ -actin | CCT GGG CAT GGA GTC CTG<br>TG      | TCT TCA TTG TGC TGG GTG CC           |
